# Supplementary material for: Implementation of National Nutrition Policies and Strategies to Reduce Unhealthy Diets: An Ecological Analysis of 194 Countries from 2017 to 2021
Source: MDPI journal article supplement (doi:10.3390/nu16060911), 2024-03-21
Supplement: s1 [file s1]

**Table S1.** Indicators included in the WHO's NCD Progress Reports and Country Capacity Surveys

| The following is a list of indicators that are included in the NCD Progress Reports          |                                                                                                                                                                                                                                                                                      | Selection in current study |
|----------------------------------------------------------------------------------------------|--------------------------------------------------------------------------------------------------------------------------------------------------------------------------------------------------------------------------------------------------------------------------------------|----------------------------|
| 1                                                                                            | The Member State should set time-bound national targets based on guidance from the World Health Organization.                                                                                                                                                                        | Included                   |
| 2                                                                                            | The Member State should have a reliable system for collecting data on the causes of death.                                                                                                                                                                                           | Included                   |
| 3                                                                                            | The Member State should conduct a health examination survey every 5 years using the STEPwise approach to surveillance (STEPS).                                                                                                                                                       | Included                   |
| 4                                                                                            | The Member State should have a national strategy/action plan that integrates the major NCDs and their shared risk factors across multiple sectors.                                                                                                                                   | Included                   |
| 5                                                                                            | The Member State should implement measures to:                                                                                                                                                                                                                                       |                            |
| 5A                                                                                           | Reduce tobacco's affordability.                                                                                                                                                                                                                                                      |                            |
| 5B                                                                                           | Eliminate exposure to second-hand smoke                                                                                                                                                                                                                                              |                            |
| 5C                                                                                           | Use plain/standardized packaging and graphic health warnings                                                                                                                                                                                                                         |                            |
| 5D                                                                                           | Ban tobacco advertising, promotion, and sponsorship                                                                                                                                                                                                                                  |                            |
| 5E                                                                                           | Educate the public about the harms of smoking/tobacco use and second-hand smoke through mass media campaigns                                                                                                                                                                         |                            |
| 6                                                                                            | The Member State should enact and enforce:                                                                                                                                                                                                                                           |                            |
| 6A                                                                                           | restrictions on the physical availability of alcohol                                                                                                                                                                                                                                 |                            |
| 6B                                                                                           | restrictions on exposure to alcohol advertising                                                                                                                                                                                                                                      |                            |
| 6C                                                                                           | the increase of excise taxes on alcoholic beverages                                                                                                                                                                                                                                  |                            |
| 7                                                                                            | The Member State should adopt national policies to:                                                                                                                                                                                                                                  |                            |
| 7A                                                                                           | Reduce population salt/sodium consumption                                                                                                                                                                                                                                            | Included                   |
| 7B                                                                                           | Limit saturated fatty acids and virtually eliminate industrially-produced trans-fatty acids in the food supply                                                                                                                                                                       | Included                   |
| 7C                                                                                           | Implement the WHO set of recommendations on marketing of foods and non-alcoholic beverages to children                                                                                                                                                                               | Included                   |
| 7D                                                                                           | Have legislation/regulations fully implementing the International Code of Marketing of Breast-milk Substitutes.                                                                                                                                                                      | Included                   |
| 8                                                                                            | The Member State should have up-to-date national public awareness programs and motivational communication strategies that promote physical activity. This includes running mass media campaigns that aim to encourage positive behavioral changes towards regular physical activity. |                            |
| 9                                                                                            | The Member State should have evidence-based national guidelines/protocols/standards for the management of major NCDs through a primary care approach that are recognized or approved by government or competent authorities.                                                         |                            |
| 10                                                                                           | The Member State should provide drug therapy and counselling for eligible persons at high risk to prevent heart attacks and strokes, with emphasis on the primary care level.                                                                                                        |                            |
| The following is a list of indicators that are included in the NCD National Capacity Surveys |                                                                                                                                                                                                                                                                                      |                            |

| The infrastructure's capacity at the national level for NCD |                                                                                                                                                                         |                                         |
|-------------------------------------------------------------|-------------------------------------------------------------------------------------------------------------------------------------------------------------------------|-----------------------------------------|
| 1                                                           | The Ministry of Health has an operational unit, branch, or department responsible for NCDs.                                                                             | Included                                |
| 2                                                           | A national multisectoral commission, agency, or mechanism is established to address NCDs at the national level.                                                         | Included                                |
| 3                                                           | A tax on sugar-sweetened beverages is implemented in the country.                                                                                                       | Included                                |
| 4                                                           | A tax on foods high in fat, sugars, or salt is implemented in the country.                                                                                              | Included (Data available only for 2021) |
| 5                                                           | The availability of price subsidies for healthy foods is ensured.                                                                                                       | Included (Data available only for 2021) |
| 6                                                           | Tax incentives are introduced to promote physical activity.                                                                                                             |                                         |
| Policies, strategies and action plans                       |                                                                                                                                                                         |                                         |
| 1                                                           | The Member State has an active national policy, strategy or action plan that addresses multiple non-communicable diseases (NCDs) and their risk factors across sectors. | Present in the NCD Progress Reports     |
| 2                                                           | The Member State has established time-bound national targets aligned with WHO guidance.                                                                                 | Present in the NCD Progress Reports     |
| 3                                                           | The Member State has implemented measures to reduce salt consumption among its population.                                                                              | Present in the NCD Progress Reports     |
| 4                                                           | The Member State has implemented policies that aim to regulate the marketing of foods to children.                                                                      | Present in the NCD Progress Reports     |
| 5                                                           | The Member State has an operational policy, strategy, or action plan that addresses cardiovascular diseases.                                                            |                                         |
| 6                                                           | The Member State has established an operational policy, strategy, or action plan that addresses cancer.                                                                 |                                         |
| 7                                                           | The Member State has established an operational policy, strategy, or action plan that addresses diabetes.                                                               |                                         |
| 8                                                           | The Member State has established an operational policy, strategy, or action plan that addresses chronic respiratory diseases.                                           |                                         |
| 9                                                           | The Member State has implemented measures to reduce the harmful use of alcohol.                                                                                         |                                         |
| 10                                                          | The Member State has established an operational policy, strategy, or action plan that addresses unhealthy diets related to NCDs.                                        | Included                                |
| 11                                                          | The Member State has established an operational policy, strategy, or action plan that aims to decrease tobacco use.                                                     |                                         |
| 12                                                          | The Member State has implemented national policies to regulate saturated fatty acids.                                                                                   | Present in the NCD Progress Reports     |

|                     |                                                                                                                                           |                                     |
|---------------------|-------------------------------------------------------------------------------------------------------------------------------------------|-------------------------------------|
| 13                  | The Member State has implemented national policies to eliminate trans-fatty acids.                                                        | Present in the NCD Progress Reports |
| 14                  | The Member State has established an operational policy, strategy, or action plan that addresses oral health.                              |                                     |
| 15                  | The Member State has established an operational policy, strategy, or action plan that addresses eye health.                               |                                     |
| 16                  | The Member State has established an operational policy, strategy, or action plan that addresses hearing health.                           |                                     |
| 17                  | The Member State has established an operational policy, strategy, or action plan that aims to reduce overweight or obesity.               |                                     |
| 18                  | The Member State has established an operational policy, strategy, or action plan that aims to reduce physical inactivity.                 |                                     |
| 19                  | The Member State has implemented a public awareness program to promote physical activity.                                                 |                                     |
| 20                  | The Member State has national guidelines for physical activity.                                                                           |                                     |
| 21                  | The Member State has national guidelines for physical activity for children under five years old.                                         |                                     |
| 22                  | The Member State has national guidelines for physical activity for children and adolescents aged 5-19.                                    |                                     |
| 23                  | The Member State has national guidelines for physical activity for adults.                                                                |                                     |
| 24                  | The Member State has national guidelines for physical activity for older adults.                                                          |                                     |
| 25                  | The Member State has policies that encourage walking and cycling as a means to promote physical activity.                                 |                                     |
| 26                  | The Member State has policies that promote physical activity in workplaces.                                                               |                                     |
| 27                  | The Member State has policies that promote physical activity in public open spaces.                                                       |                                     |
| 28                  | The Member State has policies that promote physical activity in community-based and sports initiatives.                                   |                                     |
| 29                  | The Member State has policies that promote physical activity in childcare settings.                                                       |                                     |
| 30                  | The Member State has policies that promote physical activity in active ageing.                                                            |                                     |
| 31                  | The Member State has implemented a recent mass participation event.                                                                       | Present in the NCD Progress Reports |
| 32                  | The Member State has implemented a public awareness program to promote good nutrition.                                                    | Included                            |
| <b>Surveillance</b> |                                                                                                                                           |                                     |
| 1                   | A STEPS survey or comprehensive health examination survey is conducted every five years to assess the national capacity for surveillance. | Present in the NCD Progress Reports |
| 2                   | The Member State has a population-based cancer registry.                                                                                  |                                     |
| 3                   | The Member State has a diabetes registry.                                                                                                 |                                     |

|                                                                       |                                                                                                                                       |                                         |
|-----------------------------------------------------------------------|---------------------------------------------------------------------------------------------------------------------------------------|-----------------------------------------|
| 4                                                                     | A recent national adult risk factor survey has been conducted to evaluate the prevalence of harmful alcohol use.                      |                                         |
| 5                                                                     | A recent national adult risk factor survey has been conducted to examine the prevalence of unhealthy diet.                            | Included (Data available only for 2021) |
| 6                                                                     | A recent national adult risk factor survey has been conducted to assess the prevalence of physical inactivity.                        |                                         |
| 7                                                                     | A recent national adult risk factor survey has been conducted to evaluate the prevalence of tobacco use.                              |                                         |
| 8                                                                     | A recent national adult risk factor survey has been conducted to examine the prevalence of raised blood glucose/diabetes.             |                                         |
| 9                                                                     | A recent national adult risk factor survey has been conducted to evaluate the prevalence of raised total cholesterol.                 |                                         |
| 10                                                                    | A recent national adult risk factor survey has been conducted to assess the prevalence of raised blood pressure/hypertension.         |                                         |
| 11                                                                    | A recent national adult risk factor survey has been conducted to examine the prevalence of overweight and obesity.                    |                                         |
| 12                                                                    | A recent national adult risk factor survey has been conducted to evaluate the prevalence of salt/sodium intake.                       |                                         |
| 13                                                                    | National guidelines, protocols, and standards based on evidence exist for primary care management of major non-communicable diseases. |                                         |
| 14                                                                    | National guidelines, protocols, and standards based on evidence exist for managing alcohol use disorders.                             |                                         |
| 15                                                                    | Evidence-based national guidelines, protocols, and standards exist for cancer management.                                             |                                         |
| <b>Management of NCDs: Guidelines</b>                                 |                                                                                                                                       |                                         |
| 1                                                                     | National guidelines, protocols, and standards based on evidence exist for managing cardiovascular diseases.                           |                                         |
| 2                                                                     | National guidelines, protocols, and standards based on evidence exist for managing chronic respiratory diseases.                      |                                         |
| 3                                                                     | Evidence-based national guidelines, protocols, and standards exist for diabetes management.                                           |                                         |
| 4                                                                     | National guidelines, protocols, and standards based on evidence exist for managing overweight/obesity.                                |                                         |
| 5                                                                     | National guidelines, protocols, and standards based on evidence exist for managing physical inactivity.                               |                                         |
| 6                                                                     | Evidence-based national guidelines, protocols, and standards exist for managing tobacco dependence.                                   |                                         |
| <b>Management of NCDs: Primary and secondary prevention of cancer</b> |                                                                                                                                       |                                         |
| 1                                                                     | There is a national program for screening cervical cancer in the country.                                                             |                                         |
| 2                                                                     | Breast cancer screening is a part of the national screening program.                                                                  |                                         |
| 3                                                                     | The most commonly utilized screening approach in the national cervical cancer screening program.                                      |                                         |

|                                                                                                            |                                                                                                                        |  |
|------------------------------------------------------------------------------------------------------------|------------------------------------------------------------------------------------------------------------------------|--|
| 4                                                                                                          | Percentage of women aged 30-49 years who undergo cervical cancer screening.                                            |  |
| <b>Management of NCDs: Procedures for managing NCDs at the upper tiers of the public healthcare system</b> |                                                                                                                        |  |
| 1                                                                                                          | More than half of the public sector health facilities should have provisions for acute stroke care and rehabilitation. |  |
| 2                                                                                                          | Alteplase, a medication used for acute stroke management, should be generally available in the public health system.   |  |
| 3                                                                                                          | The public health system should have general availability of coronary bypass or stenting procedures.                   |  |
| 4                                                                                                          | Diabetic retinopathy screening should be generally available in the public health system.                              |  |
| 5                                                                                                          | Dialysis procedures should be generally available in the public health system.                                         |  |
| 6                                                                                                          | Renal replacement through transplantation should be generally available in the public health system.                   |  |
| 7                                                                                                          | Retinal photocoagulation should be generally available in the public health system.                                    |  |
| 8                                                                                                          | The public health system should have general availability of thrombolytic therapy.                                     |  |
| <b>Management of NCDs: The provision of palliative care within the public health system</b>                |                                                                                                                        |  |
| 1                                                                                                          | The public health system offers palliative care in community or home-based settings.                                   |  |
| 2                                                                                                          | Palliative care is generally available in primary health care through the public health system.                        |  |
| <b>NCD-related tests and procedures in primary health care</b>                                             |                                                                                                                        |  |
| 1                                                                                                          | Cardiovascular risk stratification should be available in at least 50% of primary health care facilities.              |  |
| 2                                                                                                          | Bone marrow transplantation should be generally available in the public health system.                                 |  |
| 3                                                                                                          | Blood pressure measurement should be generally available at the primary health care level.                             |  |
| 4                                                                                                          | Diabetes testing by blood glucose measurement and OGTT should be generally available at the primary health care level. |  |
| 5                                                                                                          | Diabetes testing by HbA1c should be generally available at the primary health care level.                              |  |
| 6                                                                                                          | Dilated fundus examination should be generally available at the primary health care level.                             |  |
| 7                                                                                                          | Foot vibration perception by tuning fork should be generally available at the primary health care level.               |  |
| 8                                                                                                          | Peak flow measurement should be generally available at the primary health care level.                                  |  |
| 9                                                                                                          | Spirometry should be generally available at the primary health care level.                                             |  |
| 10                                                                                                         | Total cholesterol measurement should be generally available at the primary health care level.                          |  |
| 11                                                                                                         | Urine strips for glucose and ketone measurement should be generally available at the primary health care level.        |  |
| 12                                                                                                         | Urine testing for albumin should be generally available at the primary health care level.                              |  |
| <b>NCD-related medicines</b>                                                                               |                                                                                                                        |  |
| 1                                                                                                          | Public health sector offers ACE inhibitors in general.                                                                 |  |

|    |                                                                                                    |  |
|----|----------------------------------------------------------------------------------------------------|--|
| 2  | Public health sector offers Angiotensin II receptor blockers (ARBs) in general.                    |  |
| 3  | Public health sector offers aspirin (100 mg) in general.                                           |  |
| 4  | Public health sector offers beta blockers in general.                                              |  |
| 5  | Public health sector offers bronchodilators in general.                                            |  |
| 6  | Public health sector offers CC blockers in general.                                                |  |
| 7  | Public health sector offers combination budesonide formoterol inhaler in general.                  |  |
| 8  | Public health sector offers Fixed dose combination (lisinopril + amlodipine) in general.           |  |
| 9  | Public health sector offers Fixed dose combination (lisinopril + hydrochlorothiazide) in general.  |  |
| 10 | Public health sector offers Fixed dose combination (telmisartan + amlodipine) in general.          |  |
| 11 | Public health sector offers Fixed dose combination (telmisartan + hydrochlorothiazide) in general. |  |
| 12 | Public health sector offers metformin in general.                                                  |  |
| 13 | Public health sector offers insulin in general.                                                    |  |
| 14 | Public health sector offers nicotine replacement therapy in general.                               |  |
| 15 | Public health sector offers oral morphine in general.                                              |  |
| 16 | Public health sector offers statins in general.                                                    |  |
| 17 | Public health sector offers steroid inhalers in general.                                           |  |
| 18 | Public health sector offers sulphonylurea(s) in general.                                           |  |
| 19 | Public health sector offers thiazide diuretics in general.                                         |  |

**Table S2.** Status in the implementation of national nutrition-related policies (2017-2021)

| Policy                                 | Status  | Count<br>2017 | Percent<br>2017 | Count<br>2019 | Percent<br>2019 | Count<br>2021 | Percent<br>2021 |
|----------------------------------------|---------|---------------|-----------------|---------------|-----------------|---------------|-----------------|
| Breast-milk Substitutes Marketing Code | Full    | 39            | 20,1            | 35            | 18,0            | 25            | 12,9            |
| Breast-milk Substitutes Marketing Code | Partial | 96            | 49,5            | 101           | 52,1            | 111           | 57,2            |
| Child Food Marketing Restrictions      | Full    | 68            | 35,1            | 60            | 30,9            | 73            | 37,6            |
| Comprehensive Diet and Nutrition Plan  | Full    | 152           | 78,4            | 155           | 79,9            | 162           | 83,5            |
| Dietary Awareness Efforts              | Full    | 150           | 77,3            | 71            | 36,6            | 108           | 55,7            |
| Dietary Surveys                        | Full    |               |                 |               |                 | 92            | 47,4            |
| Fat Consumption Reduction Policy       | Full    | 68            | 35,1            | 59            | 30,4            | 55            | 28,4            |
| Fat Consumption Reduction Policy       | Partial |               |                 | 17            | 8,8             | 24            | 12,4            |
| Food Taxes for NCD Reduction           | Full    |               |                 |               |                 | 25            | 12,9            |
| Mortality Data Availability            | Full    | 74            | 38,1            | 78            | 40,2            | 82            | 42,3            |
| Mortality Data Availability            | Partial | 47            | 24,2            | 40            | 20,6            | 42            | 21,6            |
| Multisectoral NCD Committee            | Full    | 71            | 36,6            | 89            | 45,9            | 89            | 45,9            |
| NCD Reduction Targets                  | Full    | 94            | 48,5            | 111           | 57,2            | 109           | 56,2            |
| NCD Reduction Targets                  | Partial | 28            | 14,4            | 21            | 10,8            | 17            | 8,8             |
| NCD Risk Factor Surveys                | Full    | 37            | 19,1            | 52            | 26,8            | 36            | 18,6            |

|                                   |         |     |      |     |      |     |      |
|-----------------------------------|---------|-----|------|-----|------|-----|------|
| NCD Risk Factor Surveys           | Partial | 135 | 69,6 | 114 | 58,8 | 125 | 64,4 |
| Operational NCD Control Unit      | Full    | 128 | 66,0 | 148 | 76,3 | 143 | 73,7 |
| Operational NCD Plan              | Full    | 98  | 50,5 | 111 | 57,2 | 107 | 55,2 |
| Operational NCD Plan              | Partial | 22  | 11,3 | 18  | 9,3  | 13  | 6,7  |
| Price Subsidies for Healthy Foods | Full    |     |      |     |      | 15  | 7,7  |
| Salt Reduction Policy             | Full    | 51  | 26,3 | 38  | 19,6 | 33  | 17,0 |
| Salt Reduction Policy             | Partial | 34  | 17,5 | 46  | 23,7 | 64  | 33,0 |
| SSB Tax                           | Full    | 45  | 23,2 | 74  | 38,1 | 91  | 46,9 |



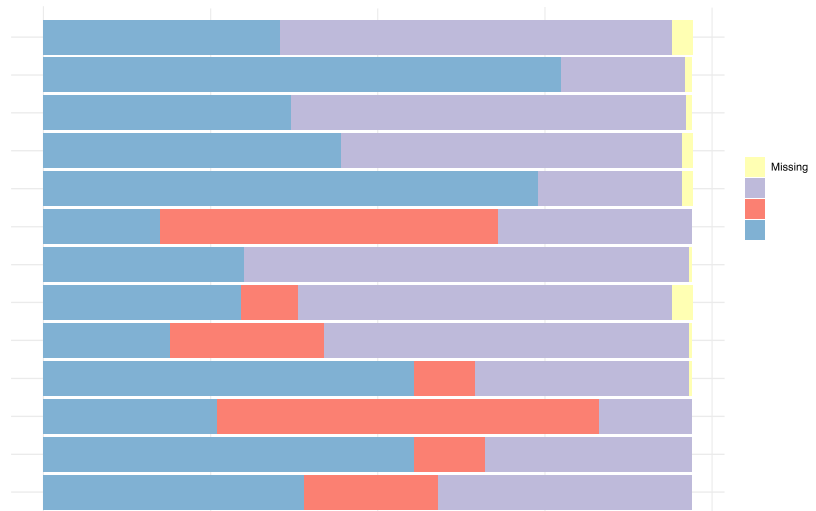

**Figure S1.** Implementation Status of Nutrition-Related Policies and Strategies in 2019

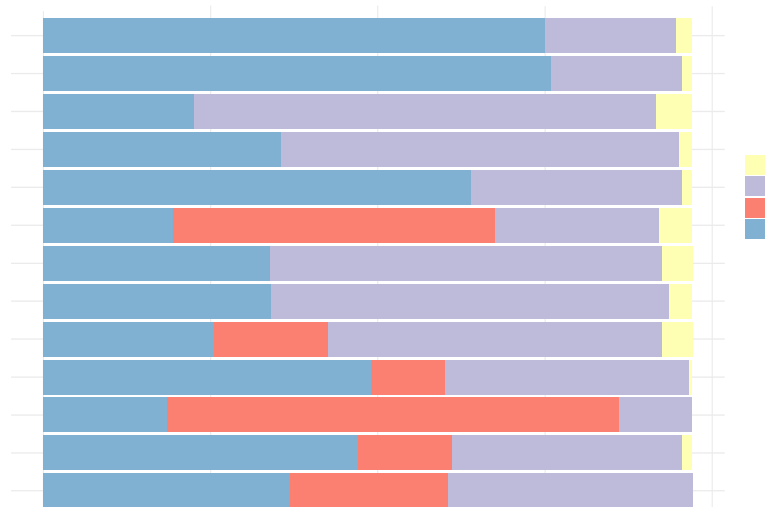

**Figure S2.** Implementation Status of Nutrition-Related Policies and Strategies in 2017

**Table S3.** Nutrition-related aggregate scores for policy implementation, ranked by aggregate score in the period 2017-2021 in each country

| Country              | 2017 | 2019 | 2021 | Δ 2017-2021 | Variance |
|----------------------|------|------|------|-------------|----------|
| Turkey               | 9    | 11,5 | 12,5 | 3,5         | 3,25     |
| Finland              | 10,5 | 12,5 | 12,5 | 2           | 1,33     |
| United Arab Emirates | 10,5 | 11   | 12,5 | 2           | 1,08     |
| Chile                | 10   | 12   | 12   | 2           | 1,33     |
| Iran                 | 12   | 12   | 12   | 0           | 0        |
| Saudi Arabia         | 12   | 10,5 | 12   | 0           | 0,75     |
| Uzbekistan           | 8    | 10   | 11,5 | 3,5         | 3,08     |
| Bahrain              | 10,5 | 12   | 11,5 | 1           | 0,58     |
| United Kingdom       | 11   | 12   | 11,5 | 0,5         | 0,25     |
| Portugal             | 11,5 | 12   | 11,5 | 0           | 0,08     |
| Brazil               | 13   | 11,5 | 11,5 | -1,5        | 0,75     |
| Uruguay              | 8    | 10,5 | 11   | 3           | 2,58     |
| Morocco              | 8,5  | 10   | 11   | 2,5         | 1,58     |
| Tajikistan           | 8,5  | 7    | 11   | 2,5         | 4,08     |
| Thailand             | 8,5  | 11   | 11   | 2,5         | 2,08     |
| Brunei Darussalam    | 9    | 8    | 11   | 2           | 2,33     |
| Kuwait               | 9,5  | 10   | 11   | 1,5         | 0,58     |
| Russian Federation   | 9,5  | 8,5  | 11   | 1,5         | 1,58     |
| Slovenia             | 9,5  | 9,5  | 11   | 1,5         | 0,75     |
| Lithuania            | 11   | 11   | 11   | 0           | 0        |
| Norway               | 11   | 12,5 | 11   | 0           | 0,75     |
| Philippines          | 3,5  | 8,5  | 10,5 | 7           | 13       |
| Tunisia              | 7,5  | 11   | 10,5 | 3           | 3,58     |
| Seychelles           | 8    | 8    | 10,5 | 2,5         | 2,08     |
| India                | 8,5  | 12   | 10,5 | 2           | 3,08     |
| Germany              | 9,5  | 10,5 | 10,5 | 1           | 0,33     |
| France               | 11   | 11,5 | 10,5 | -0,5        | 0,25     |
| Ukraine              | 1,5  | 6,5  | 10   | 8,5         | 18,25    |
| Kiribati             | 3    | 7    | 10   | 7           | 12,33    |
| El Salvador          | 7    | 8    | 10   | 3           | 2,33     |
| Ireland              | 7    | 10,5 | 10   | 3           | 3,58     |
| Poland               | 7,5  | 9,5  | 10   | 2,5         | 1,75     |

|                                  |      |      |     |      |      |
|----------------------------------|------|------|-----|------|------|
| Maldives                         | 8    | 8    | 10  | 2    | 1,33 |
| Oman                             | 8,5  | 11,5 | 10  | 1,5  | 2,25 |
| Belarus                          | 10   | 10   | 10  | 0    | 0    |
| Bulgaria                         | 10   | 10   | 10  | 0    | 0    |
| Malaysia                         | 10   | 9    | 10  | 0    | 0,33 |
| United States of America         | 11   | 10,5 | 10  | -1   | 0,25 |
| Albania                          | 6,5  | 8    | 9,5 | 3    | 2,25 |
| Cook Islands                     | 6,5  | 7,5  | 9,5 | 3    | 2,33 |
| Belgium                          | 7,5  | 10,5 | 9,5 | 2    | 2,33 |
| Czech Republic                   | 8    | 9,5  | 9,5 | 1,5  | 0,75 |
| Kyrgyz Republic                  | 9    | 8    | 9,5 | 0,5  | 0,58 |
| South Africa                     | 9    | 8,5  | 9,5 | 0,5  | 0,25 |
| Spain                            | 9    | 8,5  | 9,5 | 0,5  | 0,25 |
| Italy                            | 9,5  | 10,5 | 9,5 | 0    | 0,33 |
| Singapore                        | 9,5  | 9,5  | 9,5 | 0    | 0    |
| Canada                           | 10   | 10,5 | 9,5 | -0,5 | 0,25 |
| China                            | 10   | 7,5  | 9,5 | -0,5 | 1,75 |
| Mongolia                         | 10   | 9,5  | 9,5 | -0,5 | 0,08 |
| Qatar                            | 10   | 8,5  | 9,5 | -0,5 | 0,58 |
| Costa Rica                       | 10,5 | 10   | 9,5 | -1   | 0,25 |
| Estonia                          | 10,5 | 10   | 9,5 | -1   | 0,25 |
| Latvia                           | 11,5 | 11,5 | 9,5 | -2   | 1,33 |
| Saint Vincent and the Grenadines | 4    | 8    | 9   | 5    | 7    |
| Croatia                          | 6    | 7    | 9   | 3    | 2,33 |
| Peru                             | 8    | 9    | 9   | 1    | 0,33 |
| Panama                           | 8,5  | 6,5  | 9   | 0,5  | 1,75 |
| Armenia                          | 9    | 8,5  | 9   | 0    | 0,08 |
| Switzerland                      | 9,5  | 8,5  | 9   | -0,5 | 0,25 |
| Azerbaijan                       | 11   | 10   | 9   | -2   | 1    |
| Bangladesh                       | 5    | 7,5  | 8,5 | 3,5  | 3,25 |
| Sweden                           | 5    | 6,5  | 8,5 | 3,5  | 3,08 |
| Kenya                            | 7    | 9    | 8,5 | 1,5  | 1,08 |
| Fiji                             | 8    | 6,5  | 8,5 | 0,5  | 1,08 |
| Vanuatu                          | 8    | 5,5  | 8,5 | 0,5  | 2,58 |
| Sri Lanka                        | 8,5  | 10   | 8,5 | 0    | 0,75 |

|                                   |      |      |     |      |      |
|-----------------------------------|------|------|-----|------|------|
| Ecuador                           | 9    | 8,5  | 8,5 | -0,5 | 0,08 |
| Israel                            | 9    | 8,5  | 8,5 | -0,5 | 0,08 |
| Iraq                              | 10   | 7    | 8,5 | -1,5 | 2,25 |
| Greece                            | 4    | 5    | 8   | 4    | 4,33 |
| Iceland                           | 6    | 7,5  | 8   | 2    | 1,08 |
| Bosnia and<br>Herzegovina         | 6,5  | 6    | 8   | 1,5  | 1,08 |
| Benin                             | 7,5  | 7,5  | 8   | 0,5  | 0,08 |
| Mexico                            | 9    | 9,5  | 8   | -1   | 0,58 |
| Montenegro                        | 9    | 7,5  | 8   | -1   | 0,58 |
| Denmark                           | 10   | 9    | 8   | -2   | 1    |
| Argentina                         | 10,5 | 10,5 | 8   | -2,5 | 2,08 |
| Luxembourg                        | 4    | 6,5  | 7,5 | 3,5  | 3,25 |
| Kazakhstan                        | 6,5  | 11,5 | 7,5 | 1    | 7    |
| Palau                             | 6,5  | 6,5  | 7,5 | 1    | 0,33 |
| Austria                           | 7    | 7,5  | 7,5 | 0,5  | 0,08 |
| Serbia                            | 7    | 6    | 7,5 | 0,5  | 0,58 |
| Algeria                           | 7,5  | 4,5  | 7,5 | 0    | 3    |
| Japan                             | 7,5  | 6    | 7,5 | 0    | 0,75 |
| Nepal                             | 7,5  | 7    | 7,5 | 0    | 0,08 |
| Colombia                          | 8    | 8,5  | 7,5 | -0,5 | 0,25 |
| Netherlands                       | 8    | 7,5  | 7,5 | -0,5 | 0,08 |
| Mauritius                         | 8,5  | 5    | 7,5 | -1   | 3,25 |
| Guatemala                         | 9,5  | 9    | 7,5 | -2   | 1,08 |
| Malta                             | 11   | 10,5 | 7,5 | -3,5 | 3,58 |
| Nigeria                           | 1,5  | 3,5  | 7   | 5,5  | 7,75 |
| Tuvalu                            | 1,5  | 3    | 7   | 5,5  | 8,08 |
| Nauru                             | 5    | 4    | 7   | 2    | 2,33 |
| Egypt                             | 5,5  | 7,5  | 7   | 1,5  | 1,08 |
| Slovak<br>Republic                | 5,5  | 9    | 7   | 1,5  | 3,08 |
| Cuba                              | 6    | 5    | 7   | 1    | 1    |
| Viet Nam                          | 7    | 7    | 7   | 0    | 0    |
| Moldova                           | 10,5 | 11   | 7   | -3,5 | 4,75 |
| Turkmenistan                      | 11   | 11   | 7   | -4   | 5,33 |
| Senegal                           | 1    | 5    | 6,5 | 5,5  | 8,08 |
| Rwanda                            | 4    | 2    | 6,5 | 2,5  | 5,08 |
| United<br>Republic of<br>Tanzania | 5,5  | 7,5  | 6,5 | 1    | 1    |

|                                       |     |      |     |      |      |
|---------------------------------------|-----|------|-----|------|------|
| Romania                               | 6,5 | 7    | 6,5 | 0    | 0,08 |
| Solomon Islands                       | 6,5 | 5,5  | 6,5 | 0    | 0,33 |
| Mozambique                            | 7,5 | 5,5  | 6,5 | -1   | 1    |
| Australia                             | 8   | 5,5  | 6,5 | -1,5 | 1,58 |
| Hungary                               | 9,5 | 7,5  | 6,5 | -3   | 2,33 |
| Georgia                               | 11  | 10,5 | 6,5 | -4,5 | 6,08 |
| Malawi                                | 3   | 3    | 6   | 3    | 3    |
| Venezuela                             | 3,5 | 5,5  | 6   | 2,5  | 1,75 |
| Samoa                                 | 4   | 5    | 6   | 2    | 1    |
| Bahamas                               | 4,5 | 6    | 6   | 1,5  | 0,75 |
| Ethiopia                              | 4,5 | 6,5  | 6   | 1,5  | 1,08 |
| Niger                                 | 5   | 5,5  | 6   | 1    | 0,25 |
| Suriname                              | 5   | 6    | 6   | 1    | 0,33 |
| Belize                                | 5,5 | 5    | 6   | 0,5  | 0,25 |
| Cambodia                              | 6   | 5,5  | 6   | 0    | 0,08 |
| Paraguay                              | 7   | 6    | 6   | -1   | 0,33 |
| Tonga                                 | 7,5 | 7    | 6   | -1,5 | 0,58 |
| Barbados                              | 8,5 | 7    | 6   | -2,5 | 1,58 |
| Bhutan                                | 8,5 | 6    | 6   | -2,5 | 2,08 |
| Micronesia                            | 4   | 4    | 5,5 | 1,5  | 0,75 |
| Uganda                                | 4   | 5    | 5,5 | 1,5  | 0,58 |
| Chad                                  | 4,5 | 4    | 5,5 | 1    | 0,58 |
| Lao PDR                               | 4,5 | 3,5  | 5,5 | 1    | 1    |
| Madagascar                            | 5,5 | 4    | 5,5 | 0    | 0,75 |
| Monaco                                | 5,5 | 4    | 5,5 | 0    | 0,75 |
| Guyana                                | 7,5 | 6,5  | 5,5 | -2   | 1    |
| Dominican Republic                    | 8   | 7    | 5,5 | -2,5 | 1,58 |
| Eswatini                              | 8   | 4,5  | 5,5 | -2,5 | 3,25 |
| Jordan                                | 9,5 | 5,5  | 5,5 | -4   | 5,33 |
| Korea, Rep.                           | 11  | 10,5 | 5,5 | -5,5 | 9,25 |
| Pakistan                              | 1,5 | 1,5  | 5   | 3,5  | 4,08 |
| Togo                                  | 1,5 | 3,5  | 5   | 3,5  | 3,08 |
| Saint Lucia                           | 3   | 5,5  | 5   | 2    | 1,75 |
| Myanmar                               | 4   | 5    | 5   | 1    | 0,33 |
| Democratic People's Republic of Korea | 4,5 | 6    | 5   | 0,5  | 0,58 |

|                          |     |     |     |      |      |
|--------------------------|-----|-----|-----|------|------|
| Côte d'Ivoire            | 5,5 | 5   | 5   | -0,5 | 0,08 |
| Trinidad and Tobago      | 6   | 5   | 5   | -1   | 0,33 |
| Mali                     | 6,5 | 4   | 5   | -1,5 | 1,58 |
| Nicaragua                | 2   | 2,5 | 4,5 | 2,5  | 1,75 |
| Zambia                   | 4   | 3   | 4,5 | 0,5  | 0,58 |
| San Marino               | 4,5 | 6   | 4,5 | 0    | 0,75 |
| Jamaica                  | 8   | 2,5 | 4,5 | -3,5 | 7,75 |
| Mauritania               | 2   | 4   | 4   | 2    | 1,33 |
| Botswana                 | 2,5 | 6   | 4   | 1,5  | 3,08 |
| Sierra Leone             | 2,5 | 0   | 4   | 1,5  | 4,08 |
| Eritrea                  | 3   | 4,5 | 4   | 1    | 0,58 |
| Burundi                  | 3,5 | 4,5 | 4   | 0,5  | 0,25 |
| Saint Kitts and Nevis    | 5,5 | 3   | 4   | -1,5 | 1,58 |
| New Zealand              | 7   | 3,5 | 4   | -3   | 3,58 |
| Grenada                  | 7,5 | 5,5 | 4   | -3,5 | 3,08 |
| Niue                     | 1,5 | 0,5 | 3,5 | 2    | 2,33 |
| Namibia                  | 2,5 | 3,5 | 3,5 | 1    | 0,33 |
| Honduras                 | 3,5 | 3   | 3,5 | 0    | 0,08 |
| Lebanon                  | 4   | 3   | 3,5 | -0,5 | 0,25 |
| Marshall Islands         | 4   | 2,5 | 3,5 | -0,5 | 0,58 |
| Liberia                  | 4,5 | 4,5 | 3,5 | -1   | 0,33 |
| Cameroon                 | 5,5 | 3,5 | 3,5 | -2   | 1,33 |
| Timor-Leste              | 5,5 | 7   | 3,5 | -2   | 3,08 |
| Afghanistan              | 6   | 4,5 | 3,5 | -2,5 | 1,58 |
| Indonesia                | 7   | 6   | 3,5 | -3,5 | 3,25 |
| Central African Republic | 7,5 | 3,5 | 3,5 | -4   | 5,33 |
| Cabo Verde               | 8   | 5,5 | 3,5 | -4,5 | 5,08 |
| Guinea                   | 3   | 1   | 3   | 0    | 1,33 |
| Dominica                 | 5,5 | 3   | 3   | -2,5 | 2,08 |
| Burkina Faso             | 6   | 5   | 3   | -3   | 2,33 |
| Cyprus                   | 7   | 4,5 | 3   | -4   | 4,08 |
| Sao Tome and Principe    | 0,5 | 1,5 | 2,5 | 2    | 1    |
| Angola                   | 1,5 | 1,5 | 2,5 | 1    | 0,33 |
| Gabon                    | 2,5 | 4   | 2,5 | 0    | 0,75 |

|                                  |     |     |     |      |      |
|----------------------------------|-----|-----|-----|------|------|
| Bolivia                          | 4   | 3,5 | 2,5 | -1,5 | 0,58 |
| North Macedonia                  | 5   | 2,5 | 2,5 | -2,5 | 2,08 |
| South Sudan                      | 0   | 1   | 2   | 2    | 1    |
| Democratic Republic of the Congo | 0,5 | 3   | 2   | 1,5  | 1,58 |
| Comoros                          | 1   | 1   | 2   | 1    | 0,33 |
| Syrian Arab Republic             | 1   | 2   | 2   | 1    | 0,33 |
| Andorra                          | 3   | 1,5 | 2   | -1   | 0,58 |
| Gambia                           | 3   | 3   | 2   | -1   | 0,33 |
| Zimbabwe                         | 3   | 2   | 2   | -1   | 0,33 |
| Congo                            | 3,5 | 0   | 2   | -1,5 | 3,08 |
| Djibouti                         | 2,5 | 1,5 | 1,5 | -1   | 0,33 |
| Sudan                            | 2,5 | 5   | 1,5 | -1   | 3,25 |
| Papua New Guinea                 | 4   | 2,5 | 1,5 | -2,5 | 1,58 |
| Ghana                            | 5,5 | 2,5 | 1,5 | -4   | 4,33 |
| Lesotho                          | 6   | 4,5 | 1,5 | -4,5 | 5,25 |
| Antigua and Barbuda              | 5   | 4   | 1   | -4   | 4,33 |
| Equatorial Guinea                | 0   | 0   | 0,5 | 0,5  | 0,08 |
| Somalia                          | 0   | 0,5 | 0,5 | 0,5  | 0,08 |
| Guinea-Bissau                    | 0,5 | 0,5 | 0,5 | 0    | 0    |
| Libya                            | 0,5 | 0   | 0,5 | 0    | 0,08 |
| Haiti                            | 1   | 0,5 | 0,5 | -0,5 | 0,08 |
| Yemen                            | 1   | 1   | 0,5 | -0,5 | 0,08 |
